# Supplementary material
Source: publisher figshare collection journal article supplement (https://sage.figshare.com/ndownloader/files/16840223)
Supplement: Supplementary file 1 [file 16840223]

Supplementary file 2

Table 2. anterior midline glossopalatal synechia.

| Authors | journal | Year published | single/  multiple | midline/  lateral | cleft palate | aglossia/  microglossia | Micro  gnathia | limb anomalies | cardiac anomaly | Other head and neck anomalies | other associated anomalies |
| --- | --- | --- | --- | --- | --- | --- | --- | --- | --- | --- | --- |
| Illera | Lancet | 1887 | single | medial | N | N | N | N | N |  |  |
| Kramer | Zbl Chir | 1911 | single | medial | Y | N | N | Y | N | facial paralysis |  |
| phelip | Z Kinderh | 1920 | single | medial | Y | Y | N | Y | N | Rt CN7 palsy |  |
| Esau | Arch Clin Chir | 1921 | single | medial | N | N | N | N | N |  |  |
| Lamothe | Ann Mal Oreille Larynx | 1930 | multiple | medial, lateral | N | Y | N | Y | N | TMJ ankylosis |  |
| Keith | Br J Surg | 1940 | single | medial | Y | N | N | N | N | anencephaly |  |
| Farrington | NC Med J | 1947 | single | medial | N | Y | Y | N | N | prominent sublingual ridges, abnormal teeth |  |
| Jurgenssen | Z Kinderh | 1947 | single | medial | Y | Y | Y | Y | N | Right CN 6,7 palsy,anencephaly |  |
| Kouyoumdjian, McDonald | Cancer | 1951 | single | medial | N | N | N | Y | Y | bilateral cataract | TE fistula, esophageal atresia, ureteral obstruction, adrenal neuroblastoma |
| Cosack | Z Kinderh | 1952 | single | medial | N | N | Y | Y | N | TMJ ankylosis, left facial paralysis abnormal teeth |  |
| Bunnige | Ann Pediatr | 1960 | single | medial | N | Y | Y | Y | N | cleft tongue tip, tongue hypomobility, hypodontia |  |
| Hub and Jirasek | Cas Lek Cesk | 1960 |  |  | Y |  |  |  |  |  |  |
| Wilson | Z Kinderh | 1963 | single | medial | N | Y | N | Y | N | high arched palate |  |
| Marden PM | Minn Med | 1966 | single | medial | N | Y | N | Y | Y | bilateral CN 6,7 palsy, brain anomaly |  |
| Spivack, Bennet | Plas Recon Surg | 1968 | single | medial | N | Y | Y | Y | N | bilateral CN7 palsy, left eye antimogoloid slant |  |
| Wehinger | Z Kinderheilk | 1970 | single | medial | N | Y | Y | Y | N |  |  |
| Alvarez | Br J Plast Surg | 1976 | multiple | medial, lateral | N | Y | Y | Y | N |  |  |
| T. Nakajima | Plas Recon Surg | 1979 | single | medial | Y | N | N | Y | Y | bifid tongue, hydrocephalus |  |
| Nevin | Oral Surg | 1980 | single | medial | Y | N | N | Y | N |  | small bowel atresia with jejunal obstruction |
| Chicarilli | Plas Recon Surg | 1985 | single | medial | N | N | N | Y | N | antimongoloid slant, prominent nasal bridge, low set ears | pulmonary hypoplasia, 11 paired ribs |
| Chicarilli | Plas Recon Surg | 1985 | single | medial | N | Y | N | Y | N | high arch palate,epicanthal fold, broad nasal bridge, bilateral CN 6,7 palsy |  |
| MM Farag, A Ragaie, MA El-Oteify | J Laryngol Otol | 1988 | single | medial | Y | N | N | N | N | short pillars and narrow oropharyngeal isthmus |  |
| Legius | Am J med Genetics | 1988 | single | medial | Y | N | N | Y | Y | potter sequence | bilateral simian crease |
| Purohit SK | Br J Plast Surg | 1989 | single | medial | N | Y | N | Y | N |  |  |
| Kalu PU, Moss ALH | Br J Plast Surg | 2004 | single | medial | Y | N | N | N | N | bifid tongue |  |
| A. Ogino, K. Onish, Y. Maruyama | Eur J Plast Surg | 2005 | single | medial | Y | N | Y | N | Y | short superior labial frenulum, ankyloglossia | VSD, pulmonary stenosis |
| AK Oh, J Thakuria, V Kimonis | Cleft Palate Craniofac J | 2008 | single | medial | Y | Y | N | Y | Y | microstomia, alveolar cyst, minor hypoplasia of the auricular helices | bilateral hydronephrosis associated with vesicoureteric reflux |
| German, Michael, Wong, Hausin | Cleft Palate Craniofac J | 2011 | single | medial | Y | N | N | N | Y |  |  |
| MF Garca, U Goktas, Y Isik | J Craniofac Surg | 2012 | multiple | Medial,  lateral | Y | N | N | N | N |  |  |

Referenes

A P. Ankyloglossesuperieur congenital. *Arch Med Enfants.* 1920;23:243-244.

Alvarez GE. The aglossia-adactylia syndrome. *Br J Plast Surg.* Apr 1976;29(2):175-178.

Bunnige M. Angeborene Zungen-Munddach-Verwachsung (Ankyloglossum Superius congenitum). *Ann paediat(Basel).* 1960;194:173-180.

Chicarilli ZN, Polayes IM. Oromandibular limb hypogenesis syndromes. *Plastic and reconstructive surgery.* 1985;76(1):13-24.

Cosack G. Die angeborene Zungen-Munddach-Verwachsung als Leitmotiv eines Komplexes von multiplen Abartungen.(Zur Genese des Ankyloglossum superius.). *Zeitschrift für Kinderheilkunde.* 1953;72(3):240-257.

Farag MM, Ragaie A, El-Oteify M. Rare mid-line congenital anomalies of the face. *The Journal of Laryngology & Otology.* 1988;102(11):1040-1043.

Farrington R. Aglossia congenita; report of a case without other congenital malformations. *North Carolina medical journal.* 1947;8(1):24-26.

Garca MF, Goktas U, Isk Y, Isk D. Is the coexistence of intraoral synechia and cleft palate anomaly a sequence? *Journal of Craniofacial Surgery.* 2012;23(3):e194-e195.

German M, Wong H. Oral synechia with epithelial cyst in neonate with cleft palate: a case report. *Cleft Palate Craniofac J.* May 2011;48(3):348-350.

Hub M, Jirâsek J. Persistence of the central part of the membrane buccopharyngicae. *Casopis lekaru ceskych.* 1960;99:1297.

Illera M. Congenital occlusion of the pharynx. *Lancet.* 1887;1:742-745.

Jurgenssen O. Seltener fall einer Zungerverwachsung. *Oesterr Z Kinderheilkd Kinderfuersorge.* 1947;1:118-120.

Kalu P, Moss A. An unusual case of ankyloglossia superior. *British journal of plastic surgery.* 2004;57(6):579-581.

Keith A. Concerning the origin and nature of certain malformations of the face, head, and foot. *British Journal of Surgery.* 1940;28(110):173-192.

Kouyoumdjian AO, McDonald JJ. Association of congenital adrenal neuroblastoma with multiple anomalies, including an unusual oropharyngeal cavity (imperforate buccopharyngeal membrane?). *Cancer.* 1951;4(4):784-788.

Kramer W. Zur Entstehung der Angebrenen Gaumenspalate. *Zentralbl, Chir.* 1911;38:385.

Lamothe Dd. De, Un cas d'absence congenitale de la langue arec persistance de la membrane orale. *Ann Malad da l'oreilla, du larynx et du nez.* 1930;49:717-719.

Marden P. The syndrome of ankyloglossia superior. *Minnesota medicine.* 1966;49(8):1223.

Nakajima T, Takahashi M, Tateno S. Subglosso-palatal membrane. *Plastic and reconstructive surgery.* 1979;63(04):574-576.

Nevin NC, Kernohan DC, Ross AM. Ankyloglossum superius syndrome. *Oral Surg Oral Med Oral Pathol.* Sep 1980;50(3):254-256.

Ogino A, Onish K, Maruyama Y. Congenital oral synechia associated with cleft palate: Cleft palate medial synechia syndrome? *European Journal of Plastic Surgery.* 2005;27(7):338-340.

Oh AK, Thakuria J, Kimonis V, Mulliken JB. Subglossopalatal synechia in association with cardiac and digital anomalies. *Cleft Palate Craniofac J.* Mar 2008;45(2):217-221.

P E. Hydroencephalacele occipitale. *Arch Klin Chir.* 1921;118:817.

Purohit SK, Kumta SM, Rao PP, Thatte RL. An interesting case of aglossia-adactyly syndrome. *British journal of plastic surgery.* 1989;42(2):228-229.

Spivack J, Bennett JE. Glossopalatine ankylosis. *Plast Reconstr Surg.* Aug 1968;42(2):129-136.

Wehinger H. Kiefermißbildung und Peromelie. *Zeitschrift für Kinderheilkunde.* 1970;108(1):46-53.

Wilson RA, Kliman MR, Hardyment A. Ankyloglossia superior (palato-glossal adhesion in the newborn infant). *Pediatrics.* 1963;31(6):1051-1054.
